ICES J. Mar. Sci., 50: 103. 1993

## **Open Lecture, 1992**

---

This invited paper was presented by Dr K. H. Mann to the General Assembly of the International Council for the Exploration of the Sea in Rostock on 24 September 1992.
